# Supplementary material for: Accelerated intermittent theta burst stimulation in major depression induces decreases in modularity: A connectome analysis
Source: Oxford University Press journal article supplement (doi:10.1162/netn_a_00060), 2018-06-04
Supplement: netn_a_00060-supp.pdf [file netn_a_00060-supp.pdf]

## Supplemental Material

**Supplemental Figure 1.** Overview of the design.

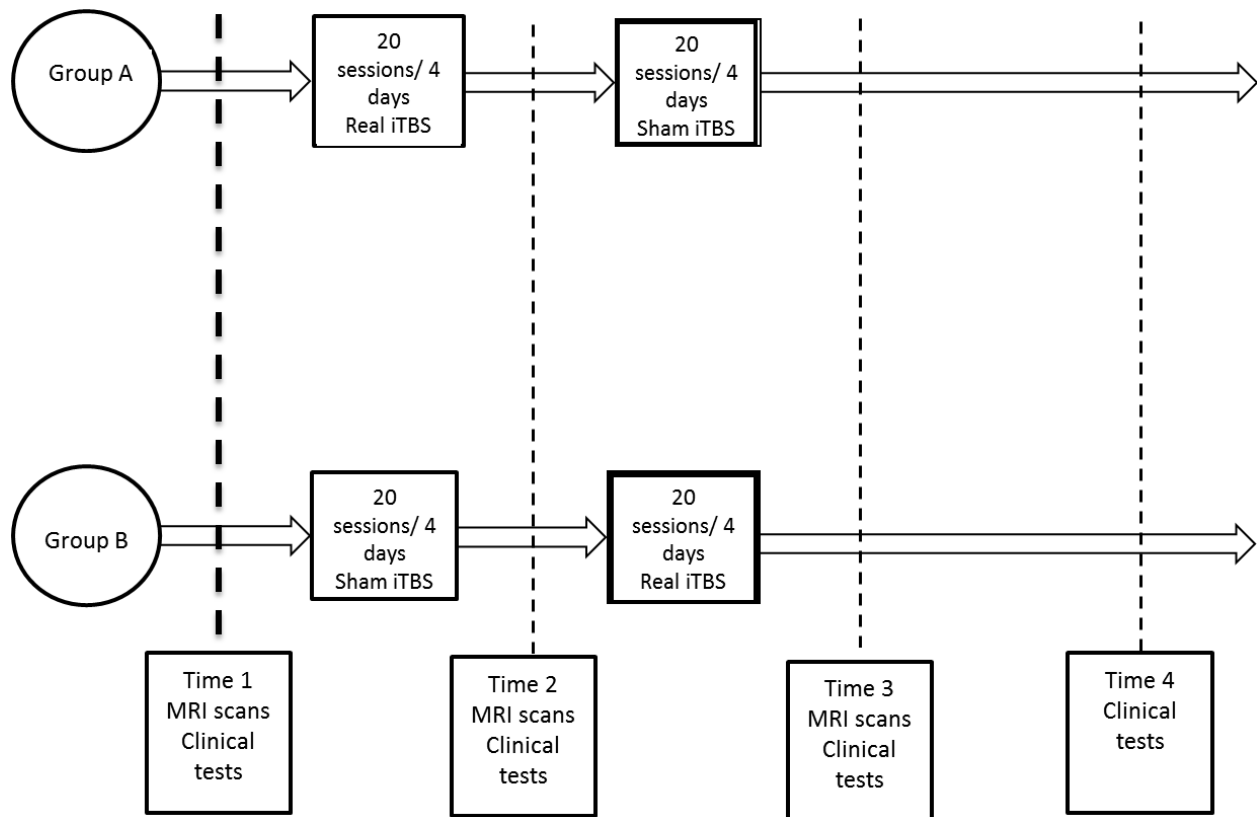

**Supplemental Table 1:** List of the nodes of the Desikan-Killiany atlas.

Abbreviations: ctx=cortex, lh=left hemisphere, rh=right hemisphere, DC=Diencephalon

|    | Region                         |
|----|--------------------------------|
| 1  | lh-Cerebellum-ctx              |
| 2  | lh-Thalamus-Proper             |
| 3  | lh-Caudate                     |
| 4  | lh-Putamen                     |
| 5  | lh-Pallidum                    |
| 6  | Brainstem                      |
| 7  | lh-Hippocampus                 |
| 8  | lh-Amygdala                    |
| 9  | lh-Accumbens-area              |
| 10 | lh-VentralDC                   |
| 11 | rh-Cerebellum-ctx              |
| 12 | rh-Thalamus-Proper             |
| 13 | rh-Caudate                     |
| 14 | rh-Putamen                     |
| 15 | rh-Pallidum                    |
| 16 | rh-Hippocampus                 |
| 17 | rh-Amygdala                    |
| 18 | rh-Accumbens-area              |
| 19 | rh-VentralDC                   |
| 20 | ctx-lh-bankssts                |
| 21 | ctx-lh-caudalanteriorcingulate |
| 22 | ctx-lh-caudalmiddlefrontal     |
| 23 | ctx-lh-corpuscallosum          |
| 24 | ctx-lh-cuneus                  |
| 25 | ctx-lh-entorhinal              |
| 26 | ctx-lh-fusiform                |
| 27 | ctx-lh-inferiorparietal        |
| 28 | ctx-lh-inferiortemporal        |
| 29 | ctx-lh-isthmuscingulate        |
| 30 | ctx-lh-lateraloccipital        |
| 31 | ctx-lh-lateralorbitofrontal    |
| 32 | ctx-lh-lingual                 |
| 33 | ctx-lh-medialorbitofrontal     |
| 34 | ctx-lh-middletemporal          |
| 35 | ctx-lh-parahippocampal         |
| 36 | ctx-lh-paracentral             |
| 37 | ctx-lh-parsopercularis         |

|    |                                 |
|----|---------------------------------|
| 38 | ctx-lh-parsorbitalis            |
| 39 | ctx-lh-parstriangularis         |
| 40 | ctx-lh-pericalcarine            |
| 41 | ctx-lh-postcentral              |
| 42 | ctx-lh-posteriorcingulate       |
| 43 | ctx-lh-precentral               |
| 44 | ctx-lh-precuneus                |
| 45 | ctx-lh-rostralanteriorcingulate |
| 46 | ctx-lh-rostralmiddlefrontal     |
| 47 | ctx-lh-superiorfrontal          |
| 48 | ctx-lh-superiorparietal         |
| 49 | ctx-lh-superiortemporal         |
| 50 | ctx-lh-supramarginal            |
| 51 | ctx-lh-frontalpole              |
| 52 | ctx-lh-temporalpole             |
| 53 | ctx-lh-transversetemporal       |
| 54 | ctx-lh-insula                   |
| 55 | ctx-rh-bankssts                 |
| 56 | ctx-rh-caudalanteriorcingulate  |
| 57 | ctx-rh-caudalmiddlefrontal      |
| 58 | ctx-rh-corpuscallosum           |
| 59 | ctx-rh-cuneus                   |
| 60 | ctx-rh-entorhinal               |
| 61 | ctx-rh-fusiform                 |
| 62 | ctx-rh-inferiorparietal         |
| 63 | ctx-rh-inferiortemporal         |
| 64 | ctx-rh-isthmuscingulate         |
| 65 | ctx-rh-lateraloccipital         |
| 66 | ctx-rh-lateralorbitofrontal     |
| 67 | ctx-rh-lingual                  |
| 68 | ctx-rh-medialorbitofrontal      |
| 69 | ctx-rh-middletemporal           |
| 70 | ctx-rh-parahippocampal          |
| 71 | ctx-rh-paracentral              |
| 72 | ctx-rh-parsopercularis          |
| 73 | ctx-rh-parsorbitalis            |
| 74 | ctx-rh-parstriangularis         |
| 75 | ctx-rh-pericalcarine            |
| 76 | ctx-rh-postcentral              |
| 77 | ctx-rh-posteriorcingulate       |
| 78 | ctx-rh-precentral               |

|    |                                 |
|----|---------------------------------|
| 79 | ctx-rh-precuneus                |
| 80 | ctx-rh-rostralanteriorcingulate |
| 81 | ctx-rh-rostralmiddlefrontal     |
| 82 | ctx-rh-superiorfrontal          |
| 83 | ctx-rh-superiorparietal         |
| 84 | ctx-rh-superiortemporal         |
| 85 | ctx-rh-supramarginal            |
| 86 | ctx-rh-frontalpole              |
| 87 | ctx-rh-temporalpole             |
| 88 | ctx-rh-transversetemporal       |
| 89 | ctx-rh-insula                   |

## Nodal analyses

Using an exploratory threshold of  $p < 0.05$ , the TRD group showed reduced local efficiency in the caudal (left:  $p < 0.007$ ; right:  $p < 0.031$ ) and rostral part (left:  $p < 0.035$ ) of the anterior cingulate, the pars opercularis of the right inferior frontal gyrus ( $p < 0.01$ ), the pars triangularis of the left inferior frontal gyrus ( $p < 0.038$ ), right insula ( $p < 0.047$ ), and right putamen ( $p < 0.042$ ), compared with controls. An increase in local efficiency could be observed in the TRD group in the right accumbens area ( $p < 0.024$ ), left pericalcarine gyrus ( $p < 0.041$ ), and right cuneus ( $p < 0.042$ ). We found decreased betweenness centrality in the left frontal pole ( $p < 0.036$ ) in the TRD group compared with the healthy controls. For the nodal clustering coefficient, we observed reduced values in the caudal part of the anterior cingulate (left:  $p < 0.036$ ; right:  $p < 0.023$ ), the pars opercularis of the right inferior frontal gyrus ( $p < 0.027$ ), the pars triangularis of the inferior frontal gyrus (left:  $p < 0.048$ , right:  $p < 0.032$ ), compared with controls. Increased values of clustering coefficient could be found in the TRD group in the right accumbens area ( $p < 0.041$ ) and right cuneus ( $p < 0.045$ ). Finally, decreased nodal degree was found in the right bank of the superior temporal sulcus ( $p < 0.045$ ) and right posterior cingulate gyrus ( $p < 0.019$ ) in the TRD group. Increased nodal degree values were observed in the TRD group in the parahippocampal gyrus (left:  $p < 0.014$ ; right:  $p < 0.045$ ), left fusiform gyrus ( $p < 0.033$ ), and the left lateral occipital cortex ( $p < 0.015$ ).

**Supplemental Table 2:** Results of the nodal analyses using an exploratory threshold.

Abbreviations: ctx=cortex, lh=left hemisphere, rh=right hemisphere, DC=Diencephalon,

TRD=patients suffering from treatment-resistant depression, con=healthy control group

| ROI                           | clustering coefficient |         | degree  |          | local efficiency |          | betweenness centrality |        |
|-------------------------------|------------------------|---------|---------|----------|------------------|----------|------------------------|--------|
|                               | p-value                | result  | p-value | result   | p-value          | result   | p-value                | result |
| lh-cerebellum-cx              | .249                   |         | .873    |          | .335             |          | .926                   |        |
| lh-thalamus-proper            | .317                   |         | .898    |          | .338             |          | .851                   |        |
| lh-caudate                    | .497                   |         | .954    |          | .856             |          | .994                   |        |
| lh-putamen                    | .937                   |         | .643    |          | .810             |          | .894                   |        |
| lh-pallidum                   | .223                   |         | .083    |          | .690             |          | .118                   |        |
| brain-stem                    | .085                   |         | .581    |          | .205             |          | .998                   |        |
| lh-hippocampus                | .845                   |         | .177    |          | .736             |          | .585                   |        |
| lh-amygdala                   | .204                   |         | .437    |          | .174             |          | .366                   |        |
| lh-accumbens-area             | .642                   |         | .429    |          | .496             |          | .409                   |        |
| lh-ventralDC                  | .184                   |         | .371    |          | .247             |          | .520                   |        |
| rh-cerebellum-cx              | .791                   |         | .926    |          | .935             |          | .290                   |        |
| rh-thalamus-proper            | .368                   |         | .477    |          | .167             |          | .662                   |        |
| rh-caudate                    | .307                   |         | .981    |          | .268             |          | .496                   |        |
| rh-putamen                    | .120                   |         | .905    |          | .042             | TRD< con | .51                    |        |
| rh-pallidum                   | .381                   |         | .393    |          | .285             |          | .778                   |        |
| rh-hippocampus                | .271                   |         | .310    |          | .312             |          | .295                   |        |
| rh-amygdala                   | .917                   |         | .564    |          | .881             |          | .351                   |        |
| rh-accumbens-area             | .041                   | TRD>con | .358    |          | .024             | TRD> con | .516                   |        |
| rh-ventralDC                  | .370                   |         | .634    |          | .338             |          | .769                   |        |
| cx-lh-bankssts                | .511                   |         | .895    |          | .512             |          | .270                   |        |
| cx-lh-caudalanteriorcingulate | .036                   | TRD<con | .341    |          | .007             | TRD< con | .342                   |        |
| cx-lh-caudalmiddlefrontal     | .482                   |         | .241    |          | .331             |          | .927                   |        |
| cx-lh-corporalcallosum        | .548                   |         | .446    |          | .763             |          | .770                   |        |
| cx-lh-cuneus                  | .171                   |         | .157    |          | .509             |          | .222                   |        |
| cx-lh-entorhinal              | .970                   |         | .122    |          | .940             |          | .609                   |        |
| cx-lh-fusiform                | .407                   |         | .033    | TRD> con | .129             |          | .512                   |        |
| cx-lh-inferiorparietal        | .648                   |         | .676    |          | .846             |          | .707                   |        |
| cx-lh-inferiortemporal        | .078                   |         | .793    |          | .137             |          | .100                   |        |
| cx-lh-isthmuscingulate        | .914                   |         | .376    |          | .564             |          | .155                   |        |
| cx-lh-lateraloccipital        | .854                   |         | .015    | TRD> con | .121             |          | .612                   |        |
| cx-lh-lateralorbitofrontal    | .274                   |         | .387    |          | .587             |          | .321                   |        |

|                                |      |         |      |             |       |             |      |         |
|--------------------------------|------|---------|------|-------------|-------|-------------|------|---------|
| cx-lh-lingual                  | .367 |         | .172 |             | .161  |             | .433 |         |
| cx-lh-medialorbitofrontal      | .365 |         | .183 |             | .585  |             | .083 |         |
| cx-lh-middletemporal           | .359 |         | .392 |             | .282  |             | .888 |         |
| cx-lh-parahippocampal          | .537 |         | .014 | TRD><br>con | .254  |             | .275 |         |
| cx-lh-paracentral              | .305 |         | .989 |             | .253  |             | .462 |         |
| cx-lh-parsopercularis          | .876 |         | .929 |             | .870  |             | .754 |         |
| cx-lh-parsorbitalis            | .426 |         | .600 |             | .684  |             | .780 |         |
| cx-lh-parstriangularis         | .048 | TRD<con | .343 |             | .038  | TRD< con    | .330 |         |
| cx-lh-pericalcarine            | .068 |         | .915 |             | .041  | TRD> con    | .208 |         |
| cx-lh-postcentral              | .306 |         | .232 |             | .578  |             | .168 |         |
| cx-lh-posteriorcingulate       | .719 |         | .375 |             | .729  |             | .669 |         |
| cx-lh-precentral               | .892 |         | .297 |             | .733  |             | .709 |         |
| cx-lh-precuneus                | .72  |         | .112 |             | .621  |             | .169 |         |
| cx-lh-rostralanteriorcingulate | .141 |         | .094 |             | .035  | TRD< con    | .211 |         |
| cx-lh-rostralmiddlefrontal     | .874 |         | .519 |             | .921  |             | .988 |         |
| cx-lh-superiorfrontal          | .550 |         | .165 |             | .793  |             | .060 |         |
| cx-lh-superiorparietal         | .615 |         | .723 |             | .583  |             | .636 |         |
| cx-lh-superiortemporal         | .345 |         | .452 | TRD<<br>con | .255  |             | .522 |         |
| cx-lh-supramarginal            | .661 |         | .700 |             | .604  |             | .501 |         |
| cx-lh-frontalpole              | .922 |         | .059 |             | .569  |             | .036 | TRD<con |
| cx-lh-temporalpole             | .907 |         | .190 |             | .673  |             | .101 |         |
| cx-lh-transversetemporal       | .816 |         | .618 |             | .977  |             | .593 |         |
| cx-lh-insula                   | .945 |         | .592 |             | .986  |             | .141 |         |
| cx-rh-bankssts                 | .243 |         | .045 |             | .533  |             | .069 |         |
| cx-rh-caudalanteriorcingulate  | .023 | TRD<con | .672 |             | 0.031 | TRD<<br>con | .664 |         |
| cx-rh-caudalmiddlefrontal      | .772 |         | .755 |             | .799  |             | .904 |         |
| cx-rh-corporcallosum           | .421 |         | .194 |             | .333  |             | .297 |         |
| cx-rh-cuneus                   | .045 | TRD>con | .608 |             | .042  | TRD><br>con | .960 |         |
| cx-rh-entorhinal               | .236 |         | .454 |             | .210  |             | .486 |         |
| cx-rh-fusiform                 | .496 |         | .528 |             | .342  |             | .112 |         |
| cx-rh-inferiorparietal         | .167 |         | .074 |             | .515  |             | .266 |         |
| cx-rh-inferiortemporal         | .229 |         | .276 |             | .290  |             | .568 |         |
| cx-rh-isthmuscingulate         | .672 |         | .415 |             | .713  |             | .121 |         |
| cx-rh-lateraloccipital         | .785 |         | .738 |             | .899  |             | .825 |         |
| cx-rh-lateralorbitofrontal     | .143 |         | .525 |             | .125  |             | .693 |         |
| cx-rh-lingual                  | .900 |         | .21  |             | .689  |             | .336 |         |
| cx-rh-medialorbitofrontal      | .536 |         | .941 |             | .531  |             | .692 |         |
| cx-rh-middletemporal           | .919 |         | .894 |             | .816  |             | .781 |         |

|                                |      |         |      |             |      |             |      |  |
|--------------------------------|------|---------|------|-------------|------|-------------|------|--|
| cx-rh-parahippocampal          | .237 |         | .045 | TRD><br>con | .102 |             | .698 |  |
| cx-rh-paracentral              | .840 |         | .537 |             | .914 |             | .612 |  |
| cx-rh-parsopercularis          | .027 | TRD<con | .404 |             | .010 | TRD<<br>con | .781 |  |
| cx-rh-parsorbitalis            | .101 |         | .506 |             | .064 |             | .655 |  |
| cx-rh-parstriangularis         | .032 | TRD<con | .805 |             | .087 |             | .784 |  |
| cx-rh-pericalcarine            | .150 |         | .106 |             | .104 |             | .121 |  |
| cx-rh-postcentral              | .130 |         | .090 |             | .367 |             | .155 |  |
| cx-rh-posteriorcingulate       | .587 |         | .019 | TRD<<br>con | .700 |             | .642 |  |
| cx-rh-precentral               | .167 |         | .898 |             | .067 |             | .280 |  |
| cx-rh-precuneus                | .753 |         | .240 |             | .492 |             | .527 |  |
| cx-rh-rostralanteriorcingulate | .873 |         | .180 |             | .963 |             | .443 |  |
| cx-rh-rostralmiddlefrontal     | .993 |         | .798 |             | .868 |             | .847 |  |
| cx-rh-superiorfrontal          | .483 |         | .330 |             | .182 |             | .695 |  |
| cx-rh-superiorparietal         | .814 |         | .361 |             | .875 |             | .559 |  |
| cx-rh-superiortemporal         | .934 |         | .883 |             | .429 |             | .285 |  |
| cx-rh-supramarginal            | .475 |         | .869 |             | .356 |             | .940 |  |
| cx-rh-frontalpole              | .786 |         | .149 |             | .276 |             | .390 |  |
| cx-rh-temporalpole             | .977 |         | .283 |             | .799 |             | .406 |  |
| cx-rh-transversetemporal       | .672 |         | .411 |             | .740 |             | .794 |  |
| cx-rh-insula                   | .083 |         | .156 |             | .047 | TRD<<br>con | .147 |  |
